# Supplementary material
Source: Royal Society of Chemistry journal article supplement (doi:10.1039/d5cp04795a)
Supplement: d5cp04795a1.pdf [file d5cp04795a1.pdf]

## **Supporting Information**

### **Engineering Berry Curvature and Anomalous Transport via Dimensional Confinement in Correlated Topological Thin Films**

Junais Habeeb Mokkath

[junais.mokkath@asu.edu.kw](mailto:junais.mokkath@asu.edu.kw)

College of Integrative Studies, Abdullah Al Salem University (ASU), Block 3, Khaldiya, Kuwait

## S1. Lattice Geometry and Thin-Film Construction

The correlated Weyl-Kondo thin film considered in this work is constructed from a diamond-derived lattice truncated along the crystallographic  $z$  direction. The system consists of  $N_z$  atomic layers stacked normal to the  $z$ -axis, with open boundary conditions imposed along this direction and full translational symmetry retained in the in-plane  $x$  and  $y$  directions. This geometry produces a quasi-two-dimensional slab while preserving the essential symmetry and connectivity of the bulk lattice. Each layer contains two sublattices inherited from the diamond structure, and nearest- and next-nearest neighbour bonds are retained within and between adjacent layers. The top and bottom layers define physical surfaces, allowing explicit evaluation of surface localization, surface states, and confinement-induced spectral reconstruction. Periodic boundary conditions in the plane define a two-dimensional Brillouin zone spanned by  $(k_x, k_y)$ , which is used throughout for electronic-structure and Berry-curvature calculations.

## S2. Effective Hamiltonian

The electronic structure is described by a layer-resolved tight-binding Hamiltonian incorporating kinetic hopping, spin-orbit coupling, Kondo hybridization, and Zeeman coupling. The total Hamiltonian is written as

$$H = H_{\text{kin}} + H_{\text{hyb}} + H_{\text{SOC}} + H_Z,$$

where each term is defined below.

### S2.1 Kinetic hopping

The kinetic term includes nearest- and next-nearest-neighbour hopping on the diamond-derived lattice, preserving time-reversal symmetry in the absence of magnetic fields. The hopping amplitudes are chosen to reproduce a semi-metallic band structure in the unhybridized limit, with bandwidths comparable to those used in previous studies of correlated topological semimetals.

$$H_{\text{kin}} = \sum_{\langle i,j \rangle} \sum_{\sigma} t_{ij} c_{i\sigma}^{\dagger} c_{j\sigma} + \sum_{\langle\langle i,j \rangle\rangle} \sum_{\sigma} t'_{ij} c_{i\sigma}^{\dagger} c_{j\sigma} - \mu \sum_{i,\sigma} c_{i\sigma}^{\dagger} c_{i\sigma}$$

### S2.2 Kondo hybridization

Correlation effects are incorporated at the level of an effective, momentum-dependent Kondo hybridization between itinerant conduction states and localized degrees of freedom. This hybridization generates a renormalized low-energy band manifold characteristic of the coherent Kondo regime. The treatment is static and mean-field-like, appropriate for low temperatures below the Kondo coherence scale, and does not include explicit frequency dependence or dynamical self-energy effects.

$$H_{\text{kin}} = \sum_{\langle i,j \rangle} \sum_{\sigma} t_{ij} c_{i\sigma}^{\dagger} c_{j\sigma} + \sum_{\langle \langle i,j \rangle \rangle} \sum_{\sigma} t'_{ij} c_{i\sigma}^{\dagger} c_{j\sigma} - \mu \sum_{i,\sigma} c_{i\sigma}^{\dagger} c_{i\sigma}$$

where  $c_{i\sigma}$  annihilates an itinerant (conduction) electron and  $f_{i\sigma}$  a localized  $f$ -electron state

### S2.3 Spin-orbit coupling

Spin-orbit coupling is introduced through symmetry-allowed spin-dependent hopping terms with strength  $\lambda_{\text{SOC}}$ . This term plays a central role in generating band inversion and nontrivial Berry curvature, and is treated as a tunable parameter throughout the study.

$$H_{\text{SOC}} = i \lambda_{\text{SOC}} \sum_{\langle \langle i,j \rangle \rangle} \sum_{\sigma,\sigma'} v_{ij} c_{i\sigma}^{\dagger} (\sigma^z)_{\sigma\sigma'} c_{j\sigma'}$$

with  $v_{ij} = \pm 1$  encoding the (lattice) chirality of the second-neighbor hopping path.

### S2.4 Zeeman coupling

An external magnetic field is incorporated via an out-of-plane Zeeman term  $B_z$ , which breaks time-reversal symmetry and enables the stabilization of Chern phases in the confined geometry. Orbital magnetic effects are neglected, and the field couples only to the spin degree of freedom.

$$H_Z = \sum_i [c_i^{\dagger} (\mathbf{B} \cdot \boldsymbol{\sigma}) c_i + g_f f_i^{\dagger} (\mathbf{B} \cdot \boldsymbol{\sigma}) f_i], \mathbf{B} = (0, 0, B_z)$$

## S3. Numerical Implementation

All calculations are performed using the PyQULA simulation environment, which provides efficient routines for constructing layer-resolved Hamiltonians, diagonalizing large sparse matrices, and evaluating topological quantities. For each value of  $N_z$ ,  $\lambda_{\text{SOC}}$ , and  $B_z$ , the Hamiltonian is constructed explicitly in real space along  $z$  and transformed to momentum space in the in-plane directions.

Electronic band structures are obtained by diagonalizing the Hamiltonian along high-symmetry paths of the two-dimensional Brillouin zone. Surface-state character is quantified by projecting eigenstates onto the outermost layers. Spin-resolved properties are evaluated from expectation values of the spin operator  $\langle S_z \rangle$  in the eigenstate basis.

### S4. Berry Curvature and Chern Number Calculations

Berry curvature is computed using a lattice-gauge discretization over a uniform  $(k_x, k_y)$  mesh. For a given occupied band  $n$ , the Berry curvature  $\Omega_n(\mathbf{k})$  is evaluated from overlaps between neighbouring

Bloch states on the discrete momentum grid. The total Chern number is obtained by summing the Berry curvature of all occupied bands and integrating over the two-dimensional Brillouin zone,

$$C = \frac{1}{2\pi} \sum_{n \in \text{occ}} \int_{\text{BZ}} \Omega_n(\mathbf{k}) d^2k$$

To reduce computational cost, Berry-curvature calculations are performed on reduced-thickness slabs  $N_z^{\text{Berry}}$  that preserve the low-energy topology while minimizing the Hilbert-space dimension. An anomalous-Hall-like response is estimated by integrating the Berry curvature of partially filled bands up to the chemical potential, providing a measure of the intrinsic band-structure contribution to transverse transport in the quasi-two-dimensional regime.

### S5. Density of States and Fermi-Surface Calculations

Bulk and surface densities of states are computed by sampling the two-dimensional Brillouin zone on a dense momentum grid and applying Gaussian broadening to the eigenvalue spectrum. Surface density of states is obtained by restricting the spectral weight to the outermost layers of the slab. Fermi-surface contours are extracted at selected energies using iso-spectral tracing routines, allowing visualization of surface-dominated and bulk-like contributions in the confined geometry.

### S6. Parameter Sets

Unless otherwise stated, calculations are performed using the following representative parameter ranges:

- Film thickness: 10 to 80 layers
- Spin-orbit coupling:  $\lambda_{\text{SOC}} = 0.05 - 0.30$
- Zeeman field:  $B_z = 0.0 - 0.40$  (dimensionless units)

These ranges are chosen to span topologically trivial, Chern insulating, and gapless regimes.

### S7. Convergence Tests

Convergence with respect to momentum-space mesh density, slab thickness, and energy broadening has been carefully tested. Berry curvature and Chern number calculations were verified against progressively finer  $(k_x, k_y)$  grids to ensure stability of the integrated topological invariants. Thickness-dependent trends were confirmed to be robust against changes in numerical parameters and reduced-slab approximations used for Berry-curvature evaluation.

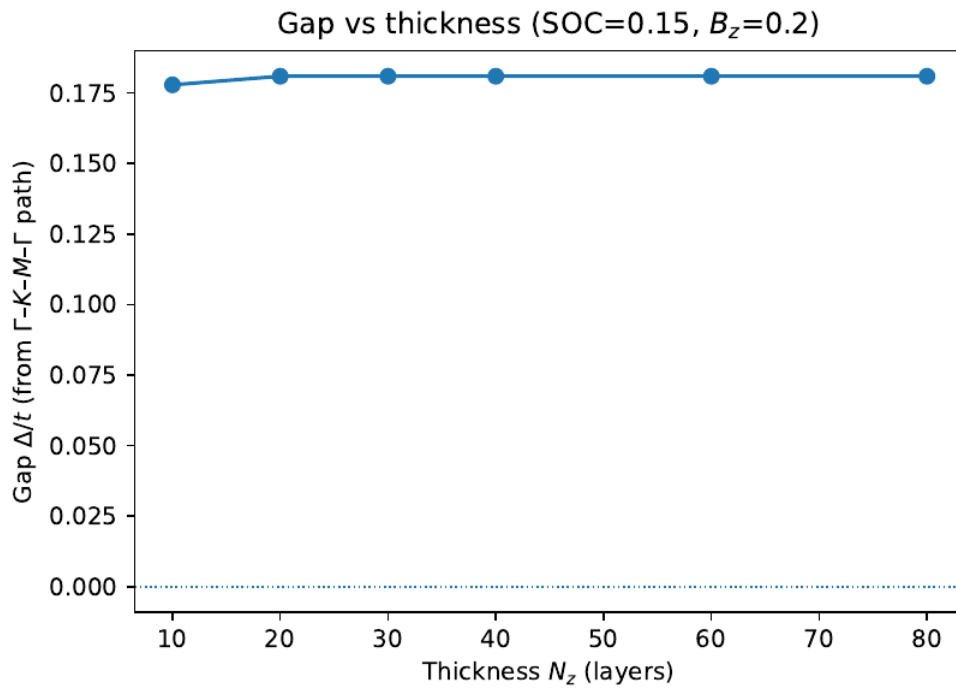

the gap varies non-monotonically with thickness: due to the competition between inter-surface hybridization at small  $N_z$  and bulk-like band reconstruction at larger  $N_z$

Table 1: Full list of numerical parameters used in the PyQUla calculations. Energies are reported in units of the nearest-neighbor hopping amplitude  $t$  and momenta in reciprocal-lattice units of the underlying lattice convention in PYQUla.

| Category              | Parameter (symbol)        | Value(s) used in this work                                                                  |
|-----------------------|---------------------------|---------------------------------------------------------------------------------------------|
| Geometry              | Lattice / parent geometry | Diamond lattice ( <code>geometry.diamond_lattice()</code> )                                 |
| Geometry              | Film construction         | Slab via <code>films.geometry_film(...)</code>                                              |
| Geometry              | Boundary conditions       | Open along $z$ ; periodic in-plane ( $x$ - $y$ )                                            |
| Geometry              | Thickness (default)       | $N_z = 20$ layers                                                                           |
| Geometry              | Thickness sweep           | $N_z \in \{10, 20, 30, 40, 60, 80\}$                                                        |
| Single-particle terms | Energy unit               | $t$ (nearest-neighbor hopping amplitude)                                                    |
| Single-particle terms | Strain (directional)      | $\varepsilon(\mathbf{r}) = 1 + 0.8 z $ via <code>add_strain(..., mode="directional")</code> |
| Single-particle terms | SOC (Kane–Mele)           | $\lambda_{\text{SOC}} = 0.15$ (default) via <code>add_kane_mele(soc)</code>                 |
| Single-particle terms | SOC sweep                 | $\lambda_{\text{SOC}} \in [0.05, 0.30]$ (8 points, linear)                                  |
| Single-particle terms | Zeeman field              | $\mathbf{B} = (0, 0, B_z)$ via <code>add_zeeman([0,0,Bz])</code>                            |
| Single-particle terms | Zeeman (default)          | $B_z = 0.2$                                                                                 |
| Single-particle terms | Zeeman sweeps             | $B_z \in [0, 0.4]$ (9 points, linear)                                                       |
| Band structure        | Path sampling             | <code>get_bands(nk=NK_BANDS)</code>                                                         |
| Band structure        | Points along path         | $N_k = 200$ ( <code>NK_BANDS=200</code> )                                                   |
| Band structure        | Thickness-scan bands      | $N_k = 80$ (used inside thickness scan)                                                     |
| Band structure        | Spin-resolved bands       | <code>get_bands(operator="sz", nk=200)</code>                                               |
| Band structure        | Surface-weight bands      | <code>get_bands(operator="surface", nk=200)</code>                                          |
| Berry / topology      | Berry curvature mesh      | <code>get_berry_curvature()</code> (default internal mesh of PYQUla)                        |
| Berry / topology      | Chern number              | <code>get_chern()</code> (computed from Berry curvature of occupied bands)                  |
| Berry / topology      | AHC-like integral         | $\sum_{\mathbf{k}} \Omega(\mathbf{k}) \Delta k_x \Delta k_y$ (script-defined normalization) |
| DOS                   | Energy window             | $E \in [-2, 2]t$ ( <code>e_min=-2.0, e_max=2.0</code> )                                     |
| DOS                   | Energy grid               | $N_E = 400$ ( <code>nE=400</code> )                                                         |
| DOS                   | Broadening                | $\delta = 10^{-2}$ (Gaussian/Lorentzian per PYQUla DOS implementation)                      |
| DOS                   | Surface DOS               | <code>get_dos(operator="surface", energies, delta)</code>                                   |
| DOS                   | Bulk DOS                  | <code>get_dos(operator="bulk", energies, delta)</code>                                      |
| Fermi surface         | Target energy             | $E = 0$                                                                                     |
| Fermi surface         | Broadening window         | $\delta = 0.05$                                                                             |
| Fermi surface         | $k$ sampling              | $N_k = 80$ ( <code>nk=80</code> )                                                           |
| Parameter maps        | Chern map grid            | $8 \times 9$ points in $(\lambda_{\text{SOC}}, B_z)$                                        |
| Parameter maps        | AHC vs $B_z$ grid         | 9 points in $B_z \in [0, 0.4]$                                                              |
